# Supplementary material for: TSC but not PTEN loss in starving cones of retinitis pigmentosa mice leads to an autophagy defect and mTORC1 dissociation from the lysosome
Source: PubMed Central journal article supplement (PMC5108335; doi:10.1038/cddis.2016.182), 2016-06-30
Supplement: cddis2016182x1.pdf [file cddis2016182x1.pdf]

## Supplementary Data

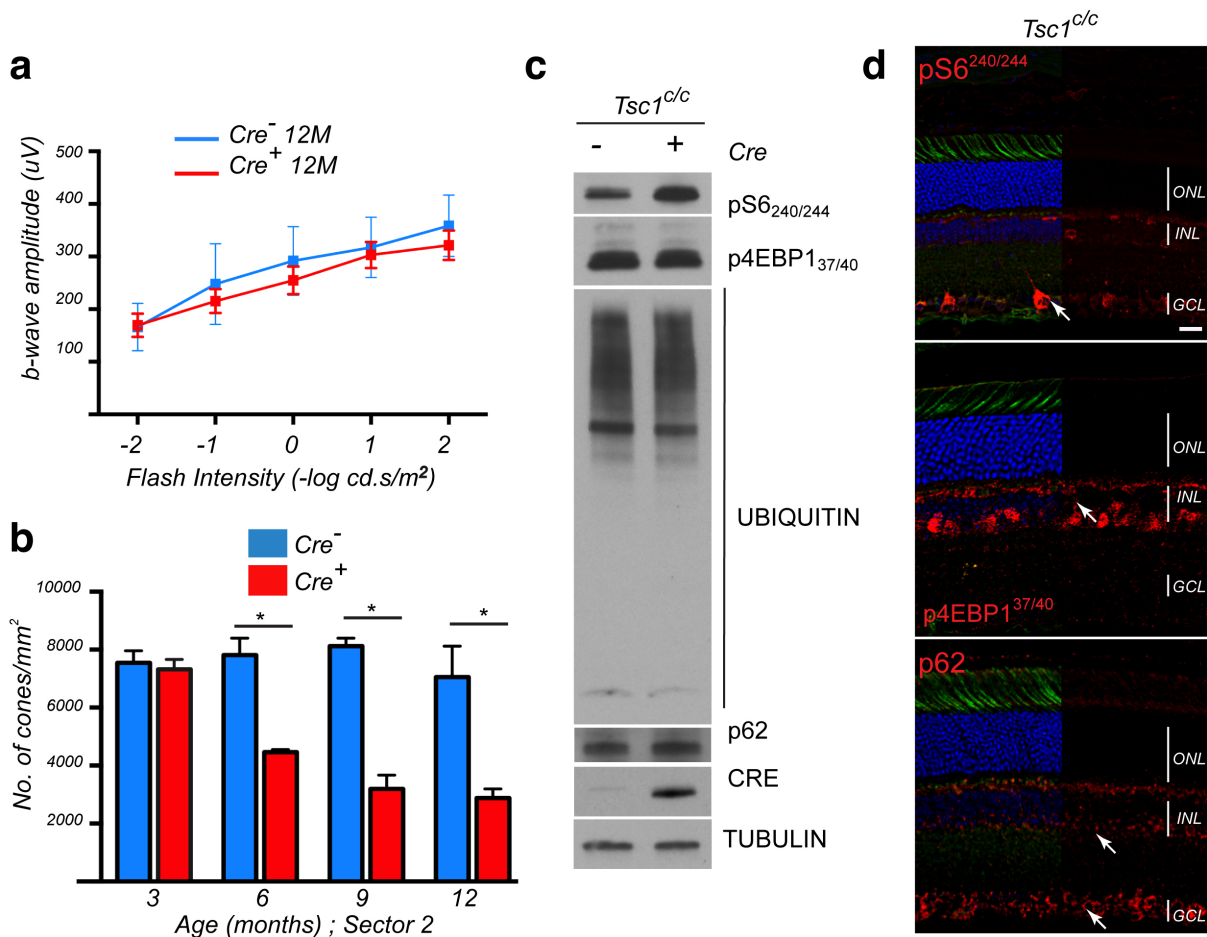

**Supplementary Figure 1** Effect of *Tsc1* loss in cones of wild-type mice. Data shown are from wild-type mice harboring the *Tsc1<sup>cl/c</sup>* allele. **(a)** Scotopic ERG recordings at 12 months of age with flashes of increasing intensities showing no significant difference between *Cre*<sup>-</sup> and *Cre*<sup>+</sup> mice. Data are representative of recordings from at least 3 mice per genotype. **(b)** Quantification of cone number based on cone arrestin staining at the indicated time points in Sector 2 (see Figure 1e for schematic of the two sectors; \*P < 0.05 by Student's *t* test). **(c)** Western blot analysis of indicated proteins in *Cre*<sup>-</sup> and *Cre*<sup>+</sup> mice at 2 months of age showing no appreciable changes between the genotypes apart from increased p-S6 in *Cre*<sup>+</sup> mice. **(d)** Immunofluorescence analysis on retinal cryosections from *Tsc1<sup>cl/c</sup>* mice at 2 months of age for indicated proteins (red signal; green: PNA; blue: nuclear DAPI). In each panel, 50% of the PNA and DAPI signal is removed to better appreciate the expression of the labeled protein in the different retinal layers (ONL: outer nuclear layer, INL: inner nuclear layer, GCL: ganglion cell layer; arrows point to expression in INL and GCL; Scale bar: 20μm).

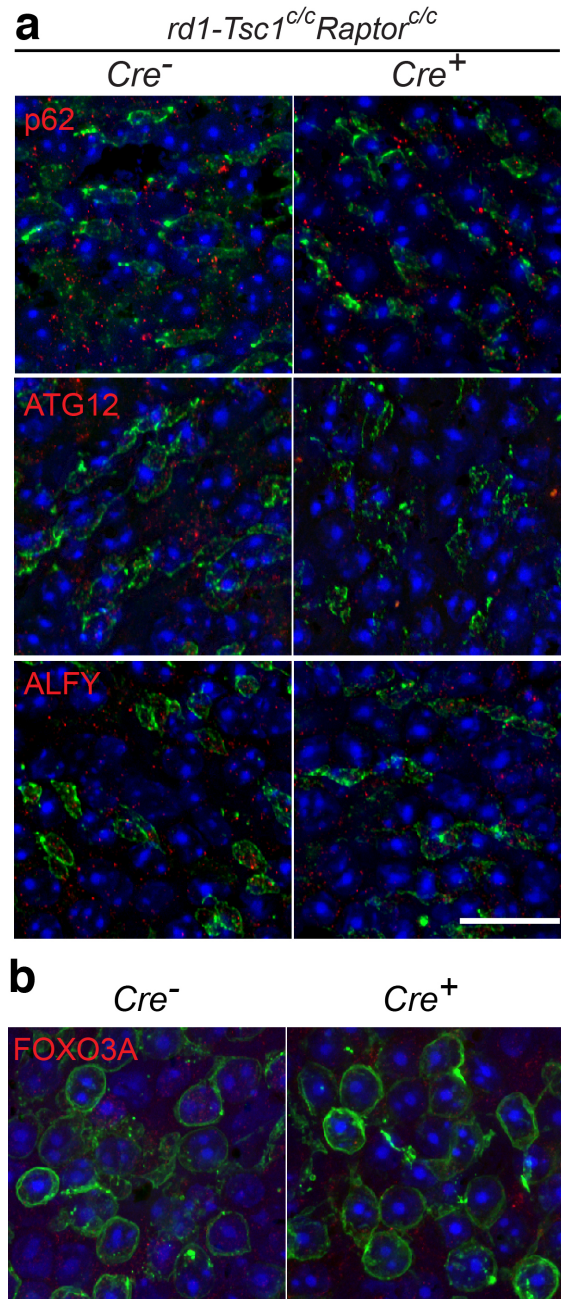

**Supplementary Figure 2** Increase in expression of autophagy genes and nuclear FOXO3A is dependent on mTORC1. **(a)** Immunofluorescence analyses on retinal flat mounts for indicated proteins (red signal) in *rd1-Tsc1<sup>c/c</sup>Raptor<sup>c/c</sup>* mice at 2 months of age showing no difference in expression between *Cre<sup>-</sup>* and *Cre<sup>+</sup>* mice. **(b)** Same genotype as in **(a)** showing the dependence of nuclear FOXO3A expression (red signal) on mTORC1 activity (green is PNA in **(a)** and SW OPSIN in **(b)**; blue: nuclear DAPI; Scale bar: 20 $\mu$ m).

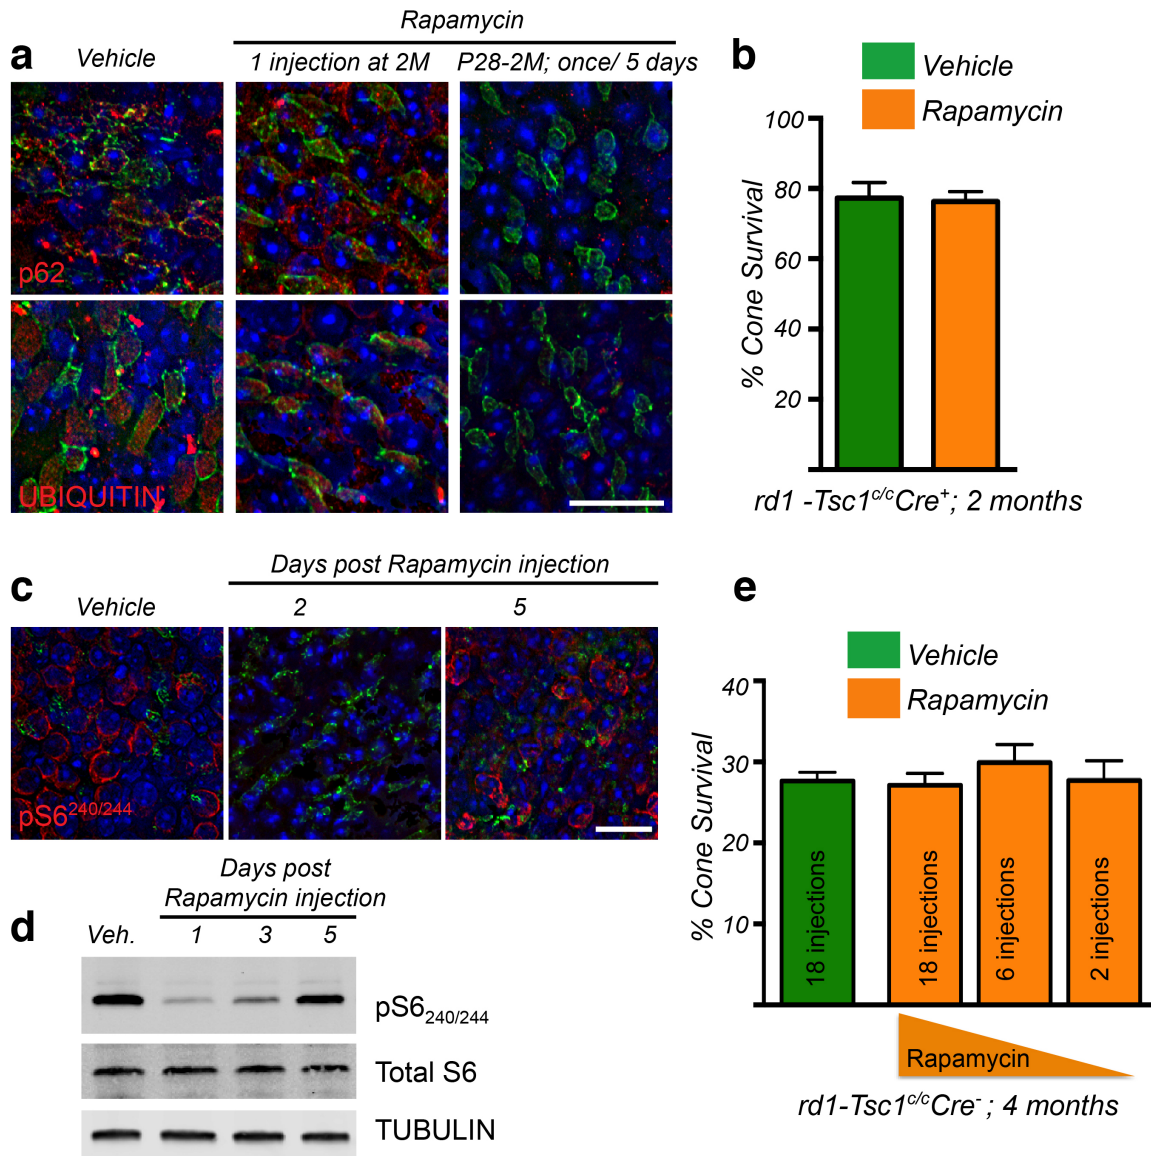

**Supplementary Figure 3** Effect of rapamycin on *rd1-Tsc1<sup>cl/c</sup>* mice. **(a)** Immunofluorescence analyses on retinal flat mounts for p62 and UBIQUITIN (red signal) in *rd1-Tsc1<sup>cl/c</sup>Cre<sup>+</sup>* mice at 2 months of age upon vehicle or rapamycin administration (Scale bar: 20 $\mu$ m). **(b)** Quantification of cone survival in *rd1-Tsc1<sup>cl/c</sup>Cre<sup>+</sup>* mice at 2 months of age when administered with vehicle or rapamycin once every five days from P28 to 2 months. **(c, d)** Kinetics of phospho-S6 recovery after one injection of rapamycin in *rd1-Tsc1<sup>cl/c</sup>Cre<sup>+</sup>* mice. **(c)** Recovery seen in cones (red signal) by immunofluorescence on retinal flat mounts (green: PNA; Scale bar: 20 $\mu$ m). **(d)** Western blot for phospho-S6 with retinal protein extracts of mice harvested 1, 3 or 5 days after rapamycin injection. By western blot pS6 is almost fully recovered by day 5. **(e)** Quantification of cone survival at 4 months of age in *rd1-Tsc1<sup>cl/c</sup>Cre<sup>-</sup>* mice treated with varying number of rapamycin injections between 1-4 months of age (*Cre<sup>-</sup>* control of Figure 5c-d).

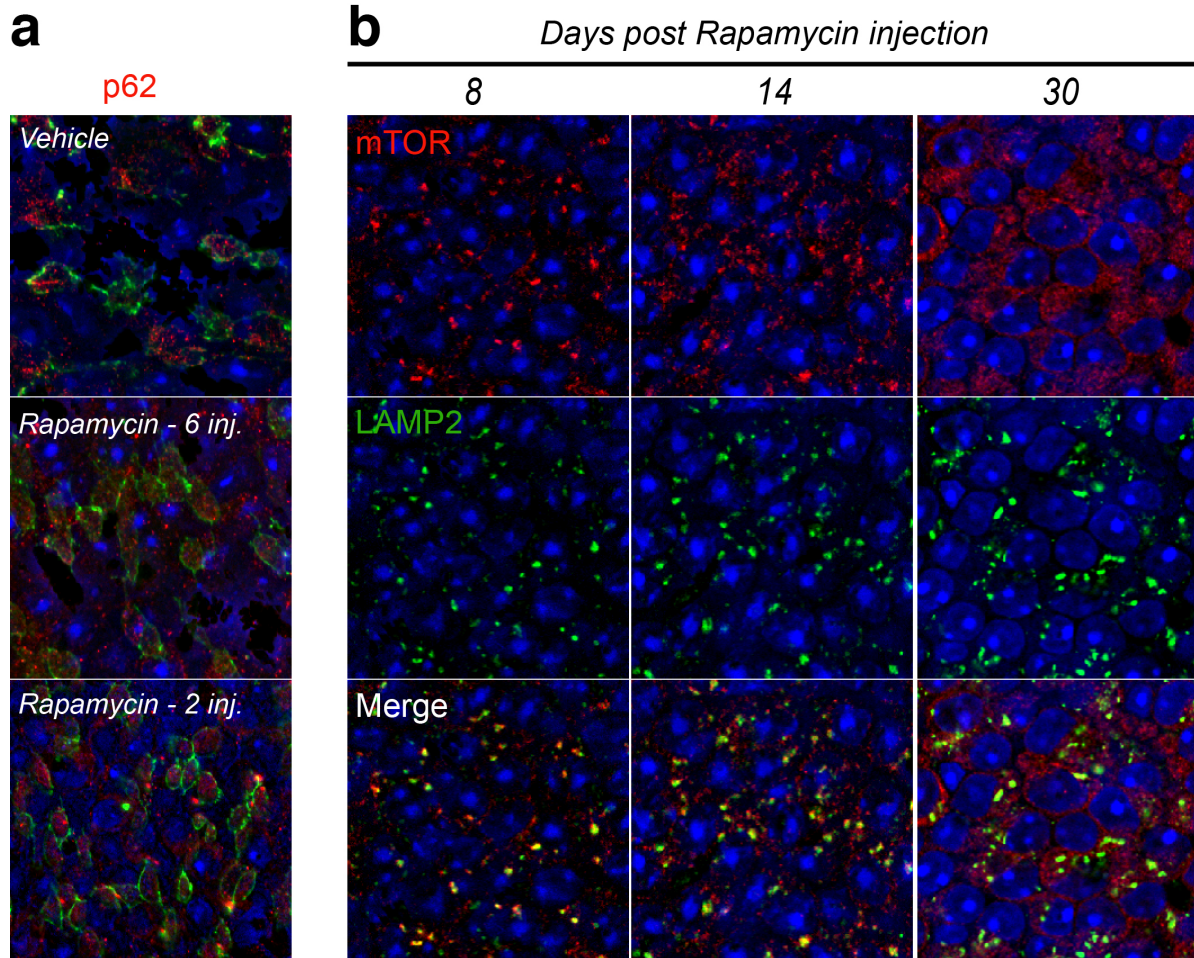

**Supplementary Figure 4** Effect of rapamycin administration in *rd1-Tsc1<sup>clc</sup>Cre<sup>+</sup>* mice. **(a)** Immunofluorescence analyses for p62 (red signal) at 4 months of age in *rd1-Tsc1<sup>clc</sup>Cre<sup>+</sup>* mice treated with vehicle, 6 and 2 injections of rapamycin (green: PNA). **(b)** Dynamic of mTOR (red signal) and LAMP2 (green signal) colocalization post rapamycin injection in *rd1-Tsc1<sup>clc</sup>Cre<sup>+</sup>* mice with upper row showing mTOR staining, middle row showing LAMP2 and lower row showing overlay of the two.

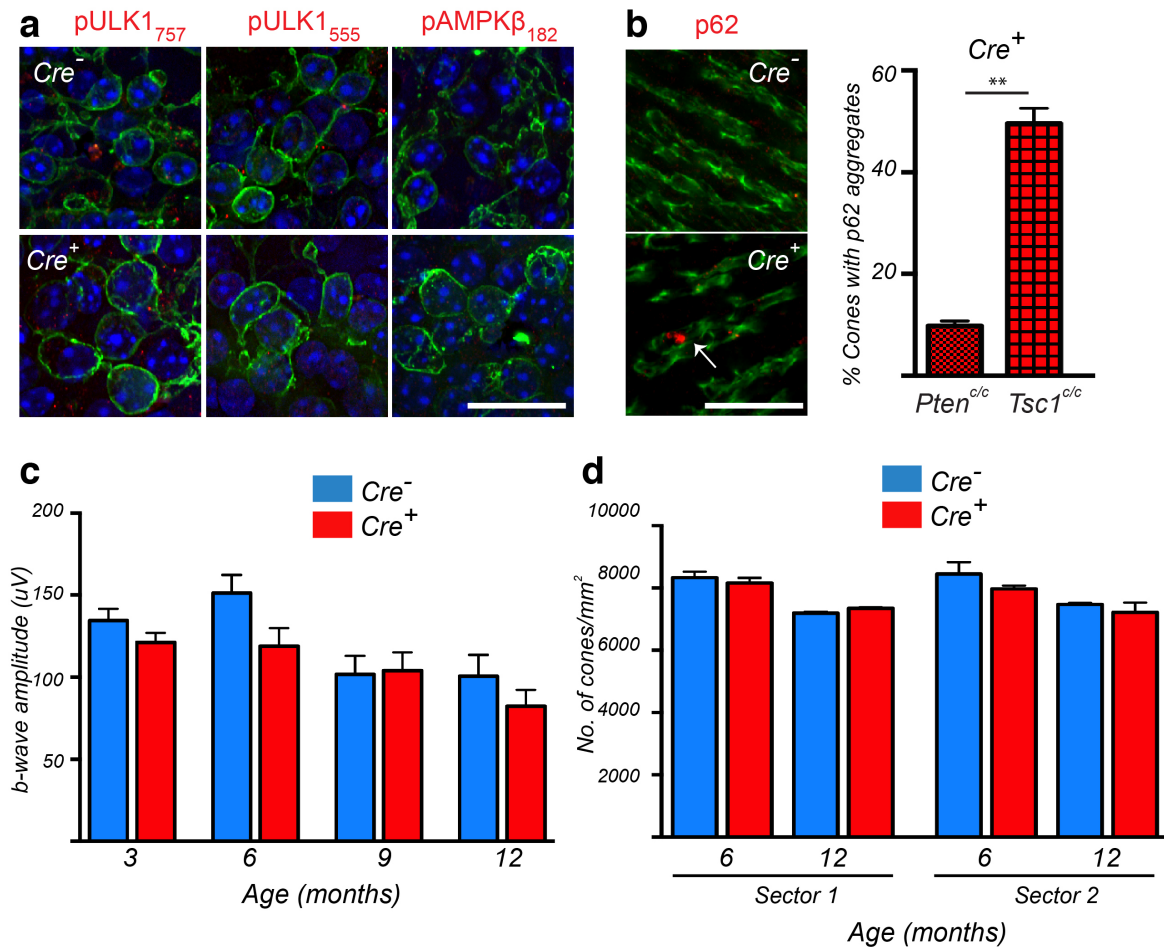

**Supplementary Figure 5** Loss of *Pten* in cones of wild-type mice does not affect cone function and expression of cone-arrestin. **(a)** Immunofluorescence analyses (red signal) on retinal flat mounts for phosphorylation sites of indicated proteins in *rd1-Pten<sup>cl/c</sup>* mice. SW OPSIN (green signal) was used to label cones (blue: nuclear DAPI; Scale bar: 20μm). **(b-d)** Analyses in *Pten<sup>cl/c</sup>* mice. **(b)** Immunofluorescence on retinal flat mounts for p62 (red signal) in cones at 2 months of age (arrow: p62 aggregate in cone segment of *Cre<sup>+</sup>* mouse; green: PNA; Scale bar: 20μm). Bar graph indicating percentage of cones with p62 aggregates in retinæ from *Pten<sup>cl/c</sup>Cre<sup>+</sup>* and *Tsc1<sup>cl/c</sup>Cre<sup>+</sup>* mice at 2 months of age. p62 aggregates were not detected in *Cre<sup>-</sup>* mice for either genotype and thus not included in the graph. Data are representative of measurements in at least 100 cone segments across 2 animals per genotype (\*\**P* < 0.01 by Student's *t* test). **(c)** Evaluation of cone function by photopic ERG recordings from at least 6 mice per group showing b-wave amplitudes over time. No significant difference was detected over time between *Cre<sup>-</sup>* and *Cre<sup>+</sup>* littermates. **(d)** Quantification of cone number based on cone arrestin staining in two retinal sectors as described in Figure **(1e)** of at least 2 animals per group. No difference was observed up to 1 year of age between *Cre<sup>-</sup>* and *Cre<sup>+</sup>* littermates.
